# Supplementary material
Source: Springer Nature journal article supplement (https://www.springermedizin.de/resource/supplementary/12986_2006_83_MOESM2_ESM.pdf/25655330)

**A**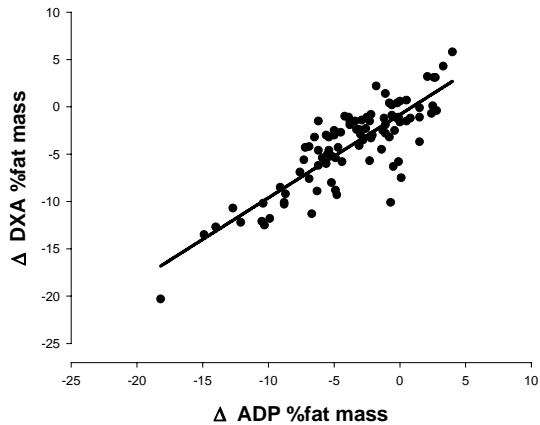**B**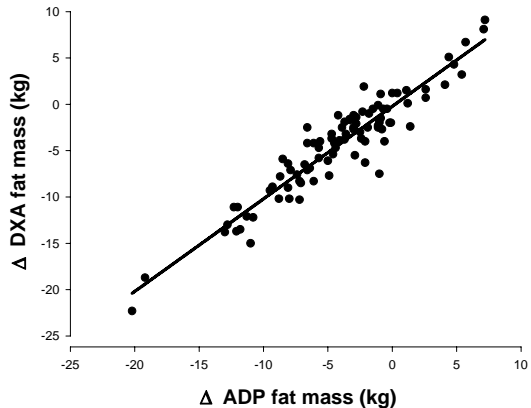**C**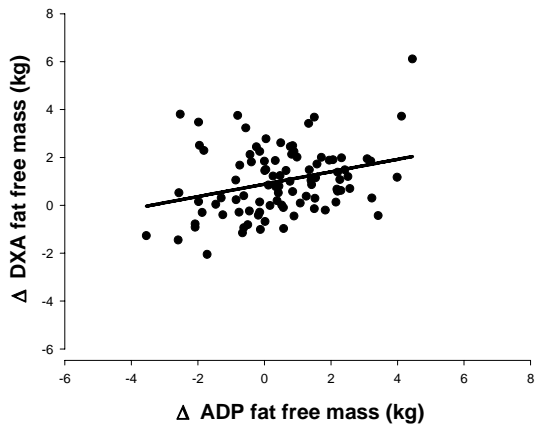

Supplement: MOESM2 [file 25655330]
